# Supplementary material for: Pediatric Mental Health Boarding
Source: Oxford University Press journal article supplement (doi:10.1542/peds.2020-1174), 2020-09-22
Supplement: peds_20201174supplementarydata.pdf [file peds_20201174supplementarydata.pdf]

# Supplemental Information

## MEDLINE AND PSYCINFO SEARCH STRATEGIES

### OID MEDLINE SEARCH STRATEGY

The search was conducted on July 29, 2019, and November 26, 2019.

1. board\*.mp.
2. (emergency or ED or Hospital).mp.
3. (pediatric\* or child\* or adolscen\* or youth).mp.
4. 1 and 2 and 3
5. ((hold\* or wait) adj6 (emergency or hospital)).mp.
6. 3 and 5
7. 4 or 6
8. Exp Mental Disorders/
9. (psychiatric or behavioral).mp.
10. 8 or 9
11. 7 and 10

Note that there are no medical subject headlines for boarding.

### PSYCHINFO SEARCH STRATEGY

The search was conducted on November 26, 2019.

(board\* or hold\* or wait\*) N6  
("emergency room\*" or "emergency department\*" or "emergency service\*")

**SUPPLEMENTAL TABLE 3** Modified Newcastle-Ottawa Quality Assessment Domains and Corresponding Quality Appraisal

| Author: Article                                                                                                                                                                        | Quality Appraisal <sup>a</sup> | Selection <sup>b</sup> | Comparability <sup>c</sup> | Outcome <sup>d</sup> |
|----------------------------------------------------------------------------------------------------------------------------------------------------------------------------------------|--------------------------------|------------------------|----------------------------|----------------------|
| Campbell and Pierce <sup>22</sup> : A Retrospective Analysis of Boarding Times for Adolescents in Psychiatric Crisis                                                                   | Poor                           | 2                      | 0                          | 2                    |
| Claudius et al <sup>23</sup> : Impact of Boarding Pediatric Psychiatric Patients on a Medical Ward                                                                                     | Poor                           | 2                      | 0                          | 3                    |
| Conrad et al <sup>24</sup> : The Impact of Behavioral Health Patients on a Pediatric Emergency Department's Length of Stay and Left Without Being Seen                                 | Poor                           | 3                      | 0                          | 2                    |
| Gallagher et al <sup>25</sup> : Psychiatric Boarding in the Pediatric Inpatient Medical Setting: A Retrospective Analysis                                                              | Poor                           | 2                      | 0                          | 3                    |
| Hoffmann et al <sup>26</sup> : Factors Associated With Boarding and Length of Stay for Pediatric Mental Health Emergency Visits                                                        | Good                           | 2                      | 2                          | 3                    |
| Mansbach et al <sup>27</sup> : Which Psychiatric Patients Board on the Medical Service?                                                                                                | Good                           | 2                      | 2                          | 3                    |
| Nolan et al <sup>28</sup> : Psychiatric Boarding Incidence, Duration, and Associated Factors in United States Emergency Departments                                                    | Good                           | 3                      | 2                          | 3                    |
| Santillanes et al <sup>29</sup> : Is Medical Clearance Necessary for Pediatric Psychiatric Patients?                                                                                   | Could not assess               | N/A                    | N/A                        | N/A                  |
| Smith et al <sup>30</sup> : Factors Associated With Length of Stay in Emergency Departments for Pediatric Patients With Psychiatric Problems                                           | Poor                           | 2                      | 0                          | 3                    |
| Wharff et al <sup>31</sup> : Predictors of Psychiatric Boarding in the Pediatric Emergency Department: Implications for Emergency Care                                                 | Good                           | 2                      | 2                          | 3                    |
| Worsley et al <sup>32</sup> : Adolescents' Experiences During "Boarding" Hospitalization While Awaiting Inpatient Psychiatric Treatment Following Suicidal Ideation or Suicide Attempt | Could not assess               | N/A                    | N/A                        | N/A                  |

N/A, not applicable.

<sup>a</sup> Quality appraisal determined on the basis of previously established decision rules for Newcastle-Ottawa Quality<sup>19,20</sup> modified for our study as follows. Good quality: 2 or 3 stars in selection domain AND 1 or 2 stars in comparability domain AND 2 or 3 stars in outcome/exposure domain. Fair quality: 1 star in selection domain AND 1 or 2 stars in comparability domain AND 2 or 3 stars in outcome/exposure domain. Poor quality: 0 or 1 star in selection domain OR 0 stars in comparability domain OR 0 or 1 stars in outcome/exposure domain.

<sup>b</sup> Maximum selection score is 3 (modified from a maximum of 4 in the original Newcastle-Ottawa quality assessment tool to exclude "Demonstration that outcome of interest was not present at start of study," which was not applicable to most studies in this review). Score of 3 indicates that the exposed cohort is representative, the nonexposed cohort was drawn from the same community, and the exposure was ascertained from a secure record or structured interview.

<sup>c</sup> Maximum comparability score is 2 and indicates that the study controls for at least 1 baseline patient-level demographic factor and at least 1 additional factor that acknowledges potential other clinical differences between the groups (eg, disease severity, comorbidities).

<sup>d</sup> Maximum outcome score is 3, with a score of 3 indicating sufficient and transparent follow-up of participants to evaluate the outcome and either independent blind assessment of outcomes or identification of outcomes via record linkage.
